# Supplementary material for: Sterol and Brassinosteroid Hormone Quantification by LC/MS of Picolinyl Ester Derivatives
Source: HighWire-hosted journal article supplement (doi:10.1101/pdb.prot108646), 2025-04-17
Supplement: SupplementalTables.docx [file SupplementalTables.docx]

Supplemental Table 1. Mass to charge (m/z) ratio for a number of known sterols and their picolinyl (PE) ester derivatives. The sterol + PE exact mass is the mass of the metabolite after derivatization. The PE product and sterol product are caused by collision-induced disassociation of the parent metabolite.

| **Sterols** | **Sterol exact mass** | **Sterol + PE exact mass** | **PE product** | **Sterol product** |
| --- | --- | --- | --- | --- |
| 7-dehydrodesmosterol | 382.3236 | 488.345 | 123.032 | 365.3208 |
| zymosterol | 384.3392 | 490.3606 | 123.032 | 367.3364 |
| desmosterol | 384.3392 | 490.3606 | 123.032 | 367.3364 |
| 7-dehydrocholesterol | 384.3392 | 490.3606 | 123.032 | 367.3364 |
| 5α-cholesta-7,24-dien-3β-ol | 384.3392 | 490.3606 | 123.032 | 367.3364 |
| lathosterol | 386.3549 | 492.3763 | 123.032 | 369.3521 |
| cholesterol | 386.3549 | 492.3763 | 123.032 | 369.3521 |
| 5α-cholest-8-en-3β-ol | 386.3549 | 492.3763 | 123.032 | 369.3521 |
| 5-dehydroepisterol | 396.3392 | 502.3606 | 123.032 | 379.3364 |
| 24-methylenecholesterol | 398.3549 | 504.3763 | 123.032 | 381.3521 |
| episterol | 398.3549 | 504.3763 | 123.032 | 381.3521 |
| 4α-methylzymosterol | 398.3549 | 504.3763 | 123.032 | 381.3521 |
| campesterol | 400.3705 | 506.3919 | 123.032 | 383.3677 |
| 24-epiCR | 400.3705 | 506.3919 | 123.032 | 383.3677 |
| 22-OH-Cholesterol | 402.3498 | 508.3712 | 123.032 | 385.347 |
| delta8,14-sterol | 410.3549 | 516.3763 | 123.032 | 393.3521 |
| 5-dehydroavenasterol | 410.3549 | 516.3763 | 123.032 | 393.3521 |
| 4,4-dimethyl-5α-cholesta-8,14,24-trien-3β-ol | 410.3549 | 516.3763 | 123.032 | 393.3521 |
| 24-methylenelophenol | 412.3705 | 518.3919 | 123.032 | 395.3677 |
| 4α-methylfecosterol | 412.3705 | 518.3919 | 123.032 | 395.3677 |
| stigmasterol | 412.3705 | 518.3919 | 123.032 | 395.3677 |
| isofucosterol | 412.3705 | 518.3919 | 123.032 | 395.3677 |
| D7-avenasterol | 412.3705 | 518.3919 | 123.032 | 395.3677 |
| 14-demethyllanosterol | 412.3705 | 518.3919 | 123.032 | 395.3677 |
| sitosterol | 414.3862 | 520.4076 | 123.032 | 397.3834 |
| 4,4-dimethyl-5α-cholesta-8-en-3β-ol | 414.3862 | 520.4076 | 123.032 | 397.3834 |
| Sitostanol | 416.402 | 522.4234 | 123.032 | 399.3992 |
| cycloeucalenol | 426.3862 | 532.4076 | 123.032 | 409.3834 |
| cycloartenol | 426.3862 | 532.4076 | 123.032 | 409.3834 |
| 24-ethylidenelophenol | 426.3862 | 532.4076 | 123.032 | 409.3834 |
| lanosterol | 426.3862 | 532.4076 | 123.032 | 409.3834 |
| obtusifoliol | 428.4018 | 534.4232 | 123.032 | 411.399 |
| 24,25-dihydrolanosterol | 428.4018 | 534.4232 | 123.032 | 411.399 |
| 22-hydroxy-campesterol-CHO | 430.34 | 536.3614 | 123.032 | 413.3372 |
| 22-hydroxy-sitostanol | 430.38 | 536.4014 | 123.032 | 413.3772 |
| 22-hydroxy-campesterol-OH | 432.36 | 538.3814 | 123.032 | 415.3572 |
| 24-methylenecycloartanol | 440.4018 | 546.4232 | 123.032 | 423.399 |
| 4α-methylzymosterol-4-carboxylate | 442.3447 | 548.3661 | 123.032 | 425.3419 |
| 22-hydroxy-campesterol-COOH | 446.34 | 552.3614 | 123.032 | 429.3372 |

Supplemental Table 2. Mass to charge (m/z) ratio for a number of known brassinosteroids (BRs) and their picolinyl ester (PE) derivatives. The BR+PE exact mass is the mass of the metabolite after derivatization. The PE product and BR product are caused by collision-induced disassociation of the parent metabolite.

| **Brassinosteroids** | **BR exact mass** | **BR+PE exact mass** | **PE product** | **BR product** |
| --- | --- | --- | --- | --- |
| cholestanol | 388.3705 | 494.3919 | 123.032 | 371.3677 |
| campest-4-en-3β-ol | 400.3705 | 506.3919 | 123.032 | 383.3677 |
| 6-oxocholestanol | 402.3498 | 508.3712 | 123.032 | 385.347 |
| campestanol | 402.3862 | 508.4076 | 123.032 | 385.3834 |
| 24-epicampestanol | 402.3862 | 508.4076 | 123.032 | 385.3834 |
| 6-deoxo-28-norcathasterone | 404.3654 | 510.3868 | 123.032 | 387.3626 |
| 22-hydroxy-cholestanol | 404.3654 | 510.3868 | 123.032 | 387.3626 |
| 22α-hydroxy-campesterol | 416.3654 | 522.3868 | 123.032 | 399.3626 |
| 6-oxocampestanol | 416.3654 | 522.3868 | 123.032 | 399.3626 |
| 28-norcathasterone | 418.3447 | 524.3661 | 123.032 | 401.3419 |
| 6-deoxocathasterone | 418.3811 | 524.4025 | 123.032 | 401.3783 |
| 6α-hydroxycampestanol | 418.3811 | 524.4025 | 123.032 | 401.3783 |
| 3-epi-6-deoxocathasterone | 418.3811 | 524.4025 | 123.032 | 401.3783 |
| 6-deoxo-28-norteasterone | 420.3603 | 526.3817 | 123.032 | 403.3575 |
| 6-deoxo-28-nortyphasterol | 420.3603 | 526.3817 | 123.032 | 403.3575 |
| cathasterone | 432.3603 | 538.3817 | 123.032 | 415.3575 |
| (22R,23R)-22,23-dihydroxycampesterol | 432.3603 | 538.3817 | 123.032 | 415.3575 |
| 28-norteasterone | 434.3396 | 540.361 | 123.032 | 417.3368 |
| 28-nortyphasterol | 434.3396 | 540.361 | 123.032 | 417.3368 |
| 6-deoxotyphasterol | 434.376 | 540.3974 | 123.032 | 417.3732 |
| 6-deoxoteasterone | 434.376 | 540.3974 | 123.032 | 417.3732 |
| 6-deoxotyphasterol | 434.376 | 540.3974 | 123.032 | 417.3732 |
| 6-deoxo-28-norcastasterone | 436.3553 | 542.3767 | 123.032 | 419.3525 |
| 26-nor-28-homoteasterone | 448.3553 | 554.3767 | 123.032 | 431.3525 |
| 26-nor-28-homotyphasterol | 448.3553 | 554.3767 | 123.032 | 431.3525 |
| typhasterol | 448.3553 | 554.3767 | 123.032 | 431.3525 |
| teasterone | 448.3553 | 554.3767 | 123.032 | 431.3525 |
| 6-deoxodolichosterone | 448.3553 | 554.3767 | 123.032 | 431.3525 |
| 28-norcastasterone (brassinone) | 450.3345 | 556.3559 | 123.032 | 433.3317 |
| 3-epi-6-deoxocastasterone | 450.3709 | 556.3923 | 123.032 | 433.3681 |
| 6-deoxo-24-epicastasterone | 450.3709 | 556.3923 | 123.032 | 433.3681 |
| 6-deoxocastasterone | 450.3709 | 556.3923 | 123.032 | 433.3681 |
| 2-deoxy-25-methyldolichosterone | 460.3553 | 566.3767 | 123.032 | 443.3525 |
| 3-epi-2-deoxy-25-methyldolichosterone | 460.3553 | 566.3767 | 123.032 | 443.3525 |
| dolichosterone | 462.3345 | 568.3559 | 123.032 | 445.3317 |
| 28-homotyphasterol | 462.3709 | 568.3923 | 123.032 | 445.3681 |
| 28-homoteasterone | 462.3709 | 568.3923 | 123.032 | 445.3681 |
| 6-deoxo-25-methyldolichosterone | 462.3709 | 568.3923 | 123.032 | 445.3681 |
| 6-deoxohomodolichosterone | 462.3709 | 568.3923 | 123.032 | 445.3681 |
| castasterone | 464.3502 | 570.3716 | 123.032 | 447.3474 |
| 26-nor-28-homocastasterone | 464.3502 | 570.3716 | 123.032 | 447.3474 |
| 7-oxatyphasterol | 464.3502 | 570.3716 | 123.032 | 447.3474 |
| 7-oxateasterone | 464.3502 | 570.3716 | 123.032 | 447.3474 |
| 3,24-diepicastasterone | 464.3502 | 570.3716 | 123.032 | 447.3474 |
| 2,3-diepicastasterone | 464.3502 | 570.3716 | 123.032 | 447.3474 |
| 2-epicastasterone | 464.3502 | 570.3716 | 123.032 | 447.3474 |
| 3-epicastasterone | 464.3502 | 570.3716 | 123.032 | 447.3474 |
| 24-epicastasterone | 464.3502 | 570.3716 | 123.032 | 447.3474 |
| 2-deoxybrassinolide | 464.3502 | 570.3716 | 123.032 | 447.3474 |
| 3-epi-2-deoxyBL | 464.3502 | 570.3716 | 123.032 | 447.3474 |
| 28-norbrassinolide | 466.3294 | 572.3508 | 123.032 | 449.3266 |
| 6A-hydroxy-castasterone | 466.3658 | 572.3872 | 123.032 | 449.363 |
| 2-epi-25-methyldolichosterone | 476.3502 | 582.3716 | 123.032 | 459.3474 |
| 2,3-diepi-25-methyldolichosterone | 476.3502 | 582.3716 | 123.032 | 459.3474 |
| 28-homodolichosterone | 476.3502 | 582.3716 | 123.032 | 459.3474 |
| 25-methyldolichosterone | 476.3502 | 582.3716 | 123.032 | 459.3474 |
| dolicholide | 478.3294 | 584.3508 | 123.032 | 461.3266 |
| 25-methylcastasterone | 478.3658 | 584.3872 | 123.032 | 461.363 |
| 28-homocastasterone | 478.3658 | 584.3872 | 123.032 | 461.363 |
| brassinolide | 480.3451 | 586.3665 | 123.032 | 463.3423 |
| 26-hydroxycastasterone | 480.3451 | 586.3665 | 123.032 | 463.3423 |
| 24-epibrassinolide | 480.3451 | 586.3665 | 123.032 | 463.3423 |
| 28-homodolicholide | 492.3451 | 598.3665 | 123.032 | 475.3423 |
| 28-homobrassinolide | 494.3607 | 600.3821 | 123.032 | 477.3579 |
| 1β-hydroxycastasterone | 494.3607 | 600.3821 | 123.032 | 477.3579 |
| 3-epi-1α-hydroxycastasterone | 494.3607 | 600.3821 | 123.032 | 477.3579 |
| 26-hydroxybrassinolide | 496.34 | 602.3614 | 123.032 | 479.3372 |

Supplemental Table 3. Raw data and calculations of brassinosteroids in root, mesocotyl, leaf and shoot apical meristem (SAM) tissues. The first set shows the peak area for d7-campesterol, retention time (RT), and mass of tissue analyzed in milligrams and grams. The second set shows how to calculate the ng/g fresh weight of campesterol for each replicate. The same is shown for 24-methylenecholesterol, isofucosterol, stigmasterol, sitosterol, campestanol, and 6-oxocampestanol.

| Tissue | Sample ID | | | d7-campesterol | RT | | Mass (mg) | | Mass (g) | |
| --- | --- | --- | --- | --- | --- | --- | --- | --- | --- | --- |
| Root | BF14 | 33613.82 | | | 18.003 | | 90 | | 0.09 | |
| Root | BF16 | 35966.5 | | | 17.978 | | 97 | | 0.097 | |
| Root | BF18 | 30654.36 | | | 17.823 | | 110 | | 0.11 | |
| Root | BF20 | 28417.1 | | | 17.9 | | 86 | | 0.086 | |
| Meso | BF2 | 30978.16 | | | 19.055 | | 109 | | 0.109 | |
| Meso | BF4 | 19392.2 | | | 18.106 | | 104 | | 0.104 | |
| Meso | BF8 | 17347.94 | | | 17.978 | | 115 | | 0.115 | |
| Meso | BF10 | 29645.06 | | | 17.901 | | 90 | | 0.09 | |
| Leaf | BF22 | 6874.46 | | | 19.286 | | 165 | | 0.165 | |
| Leaf | BF24 | 12114.54 | | | 18.157 | | 114 | | 0.114 | |
| Leaf | BF26 | 11413.26 | | | 18.131 | | 85 | | 0.085 | |
| Leaf | BF28 | 12671.9 | | | 18.029 | | 88 | | 0.088 | |
| SAM | BF30 | 374157.3 | | | 18.901 | | 124 | | 0.124 | |
| SAM | BF32 | 189101.7 | | | 17.413 | | 114 | | 0.114 | |
| SAM | BF34 | 177084.8 | | | 17.336 | | 123 | | 0.123 | |
| SAM | BF36 | 171665.9 | | | 17.388 | | 125 | | 0.125 | |
| Tissue | Sample ID | | campesterol | | | RT | | Divide measurement by internal standard | | Injection correction (multiply by 7) | | Divide by sample weight | ng/g fresh weight (multiply by 1000) |
| Root | BF14 | | 12030.59 | | | 18.313 | | 0.357906 | | 2.505342 | | 27.83714 | 27837.14 |
| Root | BF16 | | 16908.25 | | | 18.185 | | 0.470111 | | 3.290778 | | 33.92554 | 33925.54 |
| Root | BF18 | | 13113.9 | | | 18.133 | | 0.427799 | | 2.994592 | | 27.22356 | 27223.56 |
| Root | BF20 | | 10450.57 | | | 18.082 | | 0.367756 | | 2.574295 | | 29.93366 | 29933.66 |
| Meso | BF2 | | 9054.32 | | | 19.365 | | 0.292281 | | 2.045965 | | 18.77032 | 18770.32 |
| Meso | BF4 | | 4517.3 | | | 18.365 | | 0.232944 | | 1.630609 | | 15.67893 | 15678.93 |
| Meso | BF8 | | 5183.83 | | | 18.236 | | 0.298815 | | 2.091707 | | 18.18876 | 18188.76 |
| Meso | BF10 | | 6808.18 | | | 18.211 | | 0.229656 | | 1.607595 | | 17.86217 | 17862.17 |
| Leaf | BF22 | | 5307.15 | | | 19.647 | | 0.77201 | | 5.404068 | | 32.75193 | 32751.93 |
| Leaf | BF24 | | 6147.01 | | | 18.39 | | 0.507408 | | 3.551853 | | 31.15661 | 31156.61 |
| Leaf | BF26 | | 3968.97 | | | 18.39 | | 0.347751 | | 2.434255 | | 28.6383 | 28638.3 |
| Leaf | BF28 | | 4463.28 | | | 18.39 | | 0.352219 | | 2.465531 | | 28.0174 | 28017.4 |
| SAM | BF30 | | 156804 | | | 19.16 | | 0.419086 | | 2.9336 | | 23.65806 | 23658.06 |
| SAM | BF32 | | 73370.87 | | | 17.646 | | 0.387997 | | 2.715979 | | 23.82437 | 23824.37 |
| SAM | BF34 | | 77066.91 | | | 17.646 | | 0.435198 | | 3.046384 | | 24.76735 | 24767.35 |
| SAM | BF36 | | 75818.75 | | | 17.595 | | 0.441664 | | 3.091651 | | 24.73321 | 24733.21 |
| Tissue | Sample ID | | 24-methylenecholesterol | | | RT | | Divide measurement by internal standard | | Injection correction (multiply by 7) | | Divide by sample weight | ng/g fresh weight (multiply by 1000) |
| Root | BF14 | | 1649.46 | | | 13.902 | | 0.049071 | | 0.343496 | | 3.816625 | 3816.625 |
| Root | BF16 | | 2099.5 | | | 13.902 | | 0.058374 | | 0.408616 | | 4.21254 | 4212.54 |
| Root | BF18 | | 924.19 | | | 13.85 | | 0.030149 | | 0.211041 | | 1.918555 | 1918.555 |
| Root | BF20 | | 1050.32 | | | 13.876 | | 0.036961 | | 0.258726 | | 3.008441 | 3008.441 |
| Meso | BF2 | | 2348.256 | | | 14.723 | | 0.075804 | | 0.530625 | | 4.868121 | 4868.121 |
| Meso | BF4 | | 2343.19 | | | 13.953 | | 0.120832 | | 0.845821 | | 8.132894 | 8132.894 |
| Meso | BF8 | | 1472.03 | | | 13.901 | | 0.084853 | | 0.593973 | | 5.164984 | 5164.984 |
| Meso | BF10 | | 1687.65 | | | 13.825 | | 0.056929 | | 0.3985 | | 4.427775 | 4427.775 |
| Leaf | BF22 | | 185.88 | | | 14.338 | | 0.027039 | | 0.189275 | | 1.147118 | 1147.118 |
| Leaf | BF24 | | 180.17 | | | 14.004 | | 0.014872 | | 0.104105 | | 0.913206 | 913.206 |
| Leaf | BF26 | | 208.26 | | | 13.953 | | 0.018247 | | 0.12773 | | 1.50271 | 1502.71 |
| Leaf | BF28 | | 303.41 | | | 13.927 | | 0.023944 | | 0.167605 | | 1.904599 | 1904.599 |
| SAM | BF30 | | 1801 | | | 14.645 | | 0.004813 | | 0.033694 | | 0.271729 | 271.7289 |
| SAM | BF32 | | 1313.15 | | | 13.491 | | 0.006944 | | 0.048609 | | 0.426395 | 426.3951 |
| SAM | BF34 | | 1358.45 | | | 13.465 | | 0.007671 | | 0.053698 | | 0.436571 | 436.5713 |
| SAM | BF36 | | 1304.89 | | | 13.465 | | 0.007601 | | 0.053209 | | 0.425675 | 425.6747 |
| Tissue | Sample ID | | isofucosterol | | | RT | | Divide Measurement by internal standard | | Injection Correction (multiply by 7) | | Divide by sample weight | ng/g fresh weight (multiply by 1000) |
| Root | BF14 | | 2900.87 | | | 16.54 | | 0.0863 | | 0.604099 | | 6.712216 | 6712.216 |
| Root | BF16 | | 3519.4 | | | 16.488 | | 0.097852 | | 0.684965 | | 7.061497 | 7061.497 |
| Root | BF18 | | 2386.61 | | | 16.385 | | 0.077855 | | 0.544988 | | 4.95444 | 4954.44 |
| Root | BF20 | | 1859.25 | | | 16.334 | | 0.065427 | | 0.45799 | | 5.325466 | 5325.466 |
| Meso | BF2 | | 2100 | | | 17.412 | | 0.06779 | | 0.474528 | | 4.353467 | 4353.467 |
| Meso | BF4 | | 2896 | | | 16.514 | | 0.149338 | | 1.045369 | | 10.05162 | 10051.62 |
| Meso | BF8 | | 1808.51 | | | 16.411 | | 0.104249 | | 0.729745 | | 6.345607 | 6345.607 |
| Meso | BF10 | | 2146.51 | | | 16.36 | | 0.072407 | | 0.506849 | | 5.631656 | 5631.656 |
| Leaf | BF22 | | 666.24 | | | 17.36 | | 0.096915 | | 0.678407 | | 4.111556 | 4111.556 |
| Leaf | BF24 | | 769.49 | | | 16.565 | | 0.063518 | | 0.444625 | | 3.900221 | 3900.221 |
| Leaf | BF26 | | 545.67 | | | 16.462 | | 0.04781 | | 0.334671 | | 3.937309 | 3937.309 |
| Leaf | BF28 | | 778.81 | | | 16.488 | | 0.06146 | | 0.430217 | | 4.888832 | 4888.832 |
| SAM | BF30 | | 17863.43 | | | 17.36 | | 0.047743 | | 0.334202 | | 2.695175 | 2695.175 |
| SAM | BF32 | | 9645.32 | | | 15.924 | | 0.051006 | | 0.357042 | | 3.131948 | 3131.948 |
| SAM | BF34 | | 10406.67 | | | 15.924 | | 0.058767 | | 0.411366 | | 3.344439 | 3344.439 |
| SAM | BF36 | | 9351.73 | | | 15.975 | | 0.054476 | | 0.381334 | | 3.050674 | 3050.674 |
| Tissue | Sample ID | | stigmasterol | | | RT | | Divide Measurement by internal standard | | Injection Correction (multiply by 7) | | Divide by sample weight | ng/g fresh weight (multiply by 1000) |
| Root | BF14 | | 9400.8 | | | 18.56 | | 0.279671 | | 1.957695 | | 21.75216 | 21752.16 |
| Root | BF16 | | 12508.5 | | | 18.566 | | 0.347782 | | 2.434474 | | 25.09767 | 25097.67 |
| Root | BF18 | | 9719.8 | | | 18.489 | | 0.317077 | | 2.219541 | | 20.17764 | 20177.64 |
| Root | BF20 | | 6871.05 | | | 18.463 | | 0.241793 | | 1.69255 | | 19.68081 | 19680.81 |
| Meso | BF2 | | 6277.05 | | | 19.695 | | 0.202628 | | 1.418398 | | 13.01282 | 13012.82 |
| Meso | BF4 | | 3611.78 | | | 18.72 | | 0.186249 | | 1.303744 | | 12.536 | 12536 |
| Meso | BF8 | | 3525.12 | | | 18.541 | | 0.203201 | | 1.422408 | | 12.36876 | 12368.76 |
| Meso | BF10 | | 3961.09 | | | 18.51 | | 0.133617 | | 0.93532 | | 10.39245 | 10392.45 |
| Leaf | BF22 | | 2660.17 | | | 20.02 | | 0.386964 | | 2.708749 | | 16.41666 | 16416.66 |
| Leaf | BF24 | | 2678.05 | | | 18.874 | | 0.221061 | | 1.547426 | | 13.57391 | 13573.91 |
| Leaf | BF26 | | 1809.27 | | | 18.694 | | 0.158524 | | 1.109665 | | 13.05488 | 13054.88 |
| Leaf | BF28 | | 2183.08 | | | 18.643 | | 0.172277 | | 1.205941 | | 13.70387 | 13703.87 |
| SAM | BF30 | | 74457.34 | | | 19.54 | | 0.199 | | 1.393001 | | 11.23388 | 11233.88 |
| SAM | BF32 | | 36777.9 | | | 17.976 | | 0.194487 | | 1.361412 | | 11.94221 | 11942.21 |
| SAM | BF34 | | 36587.25 | | | 17.95 | | 0.206609 | | 1.44626 | | 11.75821 | 11758.21 |
| SAM | BF36 | | 34196.4 | | | 17.951 | | 0.199203 | | 1.394422 | | 11.15538 | 11155.38 |
| Tissue | Sample ID | | sitosterol | | | RT | | Divide Measurement by internal standard | | Injection Correction (multiply by 7) | | Divide by sample weight | ng/g fresh weight (multiply by 1000) |
| Root | BF14 | | 17952.71 | | | 20.926 | | 0.534087 | | 3.73861 | | 41.54011 | 41540.11 |
| Root | BF16 | | 16611.83 | | | 20.874 | | 0.46187 | | 3.233087 | | 33.33079 | 33330.79 |
| Root | BF18 | | 14504.84 | | | 20.746 | | 0.473174 | | 3.312217 | | 30.11106 | 30111.06 |
| Root | BF20 | | 11699.31 | | | 20.772 | | 0.4117 | | 2.881898 | | 33.51044 | 33510.44 |
| Meso | BF2 | | 13009.77 | | | 22.08 | | 0.419966 | | 2.939761 | | 26.97029 | 26970.29 |
| Meso | BF4 | | 6256.18 | | | 21.028 | | 0.322613 | | 2.258293 | | 21.71435 | 21714.35 |
| Meso | BF8 | | 5042.59 | | | 20.797 | | 0.290674 | | 2.034716 | | 17.69318 | 17693.18 |
| Meso | BF10 | | 5907.62 | | | 20.746 | | 0.199278 | | 1.394949 | | 15.49943 | 15499.43 |
| Leaf | BF22 | | 13734.87 | | | 22.234 | | 1.997956 | | 13.98569 | | 84.76178 | 84761.78 |
| Leaf | BF24 | | 16703.38 | | | 21.003 | | 1.378788 | | 9.651515 | | 84.66241 | 84662.41 |
| Leaf | BF26 | | 9317.82 | | | 20.9 | | 0.816403 | | 5.714821 | | 67.23319 | 67233.19 |
| Leaf | BF28 | | 9657.79 | | | 20.874 | | 0.762142 | | 5.334996 | | 60.62495 | 60624.95 |
| SAM | BF30 | | 634646.3 | | | 21.67 | | 1.696202 | | 11.87341 | | 95.75333 | 95753.33 |
| SAM | BF32 | | 336908.6 | | | 20.053 | | 1.781627 | | 12.47139 | | 109.3981 | 109398.1 |
| SAM | BF34 | | 341979.2 | | | 20.028 | | 1.93116 | | 13.51812 | | 109.9034 | 109903.4 |
| SAM | BF36 | | 325675.8 | | | 20.002 | | 1.897149 | | 13.28004 | | 106.2403 | 106240.3 |
| Tissue | Sample ID | | campestanol | | | RT | | Divide Measurement by internal standard | | Injection Correction (multiply by 7) | | Divide by sample weight | ng/g fresh weight (multiply by 1000) |
| Root | BF14 | | 565.06 | | | 18.21 | | 0.01681 | | 0.117672 | | 1.307471 | 1307.471 |
| Root | BF16 | | 752.67 | | | 18.261 | | 0.020927 | | 0.146489 | | 1.510194 | 1510.194 |
| Root | BF18 | | 606.5 | | | 18.158 | | 0.019785 | | 0.138496 | | 1.259053 | 1259.053 |
| Root | BF20 | | 531.54 | | | 18.133 | | 0.018705 | | 0.130935 | | 1.522495 | 1522.495 |
| Meso | BF2 | | 509.56 | | | 19.416 | | 0.016449 | | 0.115143 | | 1.056358 | 1056.358 |
| Meso | BF4 | | 275.67 | | | 18.338 | | 0.014216 | | 0.099509 | | 0.956813 | 956.8131 |
| Meso | BF8 | | 277.54 | | | 18.261 | | 0.015998 | | 0.111989 | | 0.973818 | 973.8182 |
| Meso | BF10 | | 350.05 | | | 18.107 | | 0.011808 | | 0.082656 | | 0.918403 | 918.403 |
| Leaf | BF22 | | 209.95 | | | 19.57 | | 0.030541 | | 0.213784 | | 1.295661 | 1295.661 |
| Leaf | BF24 | | 283.68 | | | 18.518 | | 0.023416 | | 0.163915 | | 1.437855 | 1437.855 |
| Leaf | BF26 | | 161.94 | | | 18.364 | | 0.014189 | | 0.099321 | | 1.168486 | 1168.486 |
| Leaf | BF28 | | 262.75 | | | 18.466 | | 0.020735 | | 0.145144 | | 1.649363 | 1649.363 |
| SAM | BF30 | | 6696.48 | | | 19.21 | | 0.017898 | | 0.125283 | | 1.010343 | 1010.343 |
| SAM | BF32 | | 3237.31 | | | 17.645 | | 0.017119 | | 0.119836 | | 1.051192 | 1051.192 |
| SAM | BF34 | | 3491.64 | | | 17.62 | | 0.019717 | | 0.138021 | | 1.122124 | 1122.124 |
| SAM | BF36 | | 3486.7 | | | 17.646 | | 0.020311 | | 0.142177 | | 1.137414 | 1137.414 |
| Tissue | Sample ID | | 6-oxocampestanol | | | RT | | Divide Measurement by internal standard | | Injection Correction (multiply by 7) | | Divide by sample weight | ng/g fresh weight (multiply by 1000) |
| Root | BF14 | | 947.43 | | | 20.848 | | 0.028186 | | 0.1973 | | 2.192223 | 2192.223 |
| Root | BF16 | | 712.05 | | | 20.925 | | 0.019798 | | 0.138583 | | 1.428692 | 1428.692 |
| Root | BF18 | | 744.98 | | | 20.694 | | 0.024303 | | 0.170118 | | 1.546528 | 1546.528 |
| Root | BF20 | | 621.65 | | | 20.668 | | 0.021876 | | 0.153131 | | 1.780598 | 1780.598 |
| Meso | BF2 | | 723.92 | | | 22.054 | | 0.023369 | | 0.163581 | | 1.500744 | 1500.744 |
| Meso | BF4 | | 372.19 | | | 21.079 | | 0.019193 | | 0.134349 | | 1.291821 | 1291.821 |
| Meso | BF8 | | 209.06 | | | 20.925 | | 0.012051 | | 0.084357 | | 0.733539 | 733.539 |
| Meso | BF10 | | 297.83 | | | 20.797 | | 0.010047 | | 0.070326 | | 0.781397 | 781.3968 |
| Leaf | BF22 | | 617.27 | | | 22.387 | | 0.089792 | | 0.628542 | | 3.809348 | 3809.348 |
| Leaf | BF24 | | 827.29 | | | 21.002 | | 0.068289 | | 0.478023 | | 4.193185 | 4193.185 |
| Leaf | BF26 | | 422.34 | | | 20.848 | | 0.037004 | | 0.25903 | | 3.047415 | 3047.415 |
| Leaf | BF28 | | 530.95 | | | 20.745 | | 0.0419 | | 0.293299 | | 3.332938 | 3332.938 |
| SAM | BF30 | | 23087.4 | | | 21.694 | | 0.061705 | | 0.431935 | | 3.483351 | 3483.351 |
| SAM | BF32 | | 14253.62 | | | 20.052 | | 0.075375 | | 0.527628 | | 4.628316 | 4628.316 |
| SAM | BF34 | | 14386.47 | | | 20.001 | | 0.081241 | | 0.568684 | | 4.623446 | 4623.446 |
| SAM | BF36 | | 13046.24 | | | 20.001 | | 0.075998 | | 0.531985 | | 4.255879 | 4255.879 |

Supplemental Table 4. Mass to charge (m/z) ratio for a number of known brassinosteroids (BRs) and sterols and their keto-reagent derivatives. The BR+keto exact mass is the mass of the metabolite after derivatization. The Keto product and BR product are caused by collision-induced disassociation of the parent metabolite.

| **Brassinosteroids/sterols** | **BR/sterol exact mass** | **BR/sterol + keto exact mass** | **Keto product** | **BR product** |
| --- | --- | --- | --- | --- |
| 3-keto-4-methylzymosterol | 396.3392 | 511.4622 | 59.073 | 452.3892 |
| campest-4-en-3-one | 398.3549 | 513.4779 | 59.073 | 454.4049 |
| 5α-campestan-3-one | 400.3705 | 515.4935 | 59.073 | 456.4205 |
| 22α-hydroxy-campest-4-en-3-one | 414.3498 | 529.4728 | 59.073 | 470.3998 |
| 22α-hydroxy-5alpha-campestan-3-one | 416.3654 | 531.4884 | 59.073 | 472.4154 |
| 6-deoxo-28-nor-3-dehydroteasterone | 418.3447 | 533.4677 | 59.073 | 474.3947 |
| (22R,23R)-22,23-dihydroxy-campest-4-en-3-one | 430.3447 | 545.4677 | 59.073 | 486.3947 |
| 28-nor-3-dehydroteasterone | 432.324 | 547.447 | 59.073 | 488.374 |
| 3-dehydro-6-deoxoteasterone | 432.3603 | 547.4833 | 59.073 | 488.4103 |
| 3-dehydroteasterone | 446.3396 | 561.4626 | 59.073 | 502.3896 |
| 3-oxoteasterone | 446.3396 | 561.4626 | 59.073 | 502.3896 |
